# Supplementary material for: Enhanced performance of lithium–sulfur batteries based on single-sided chemical tailoring, and organosiloxane grafted PP separator
Source: Royal Society of Chemistry journal article supplement (doi:10.1039/d0ra02833a), 2020-01-01
Supplement: d0ra02833a1.pdf [file d0ra02833a1.pdf]

## Supporting information

### Enhanced performance of lithium-sulfur battery based on the single-sided chemical tailoring, and organosiloxane grafted PP separator

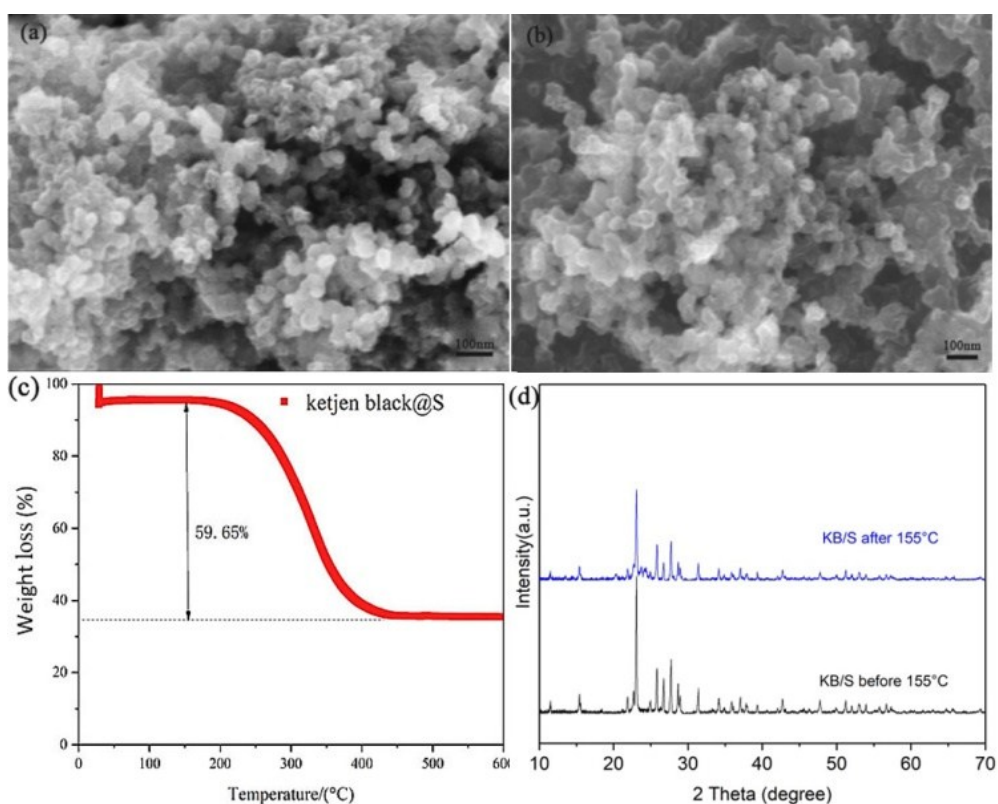

**Fig. S1** SEM images of (a) KB and (b) KB/S; (c) TG curve of KB/S; (d) XRD patterns of KB/S cathode before and after 155 °C

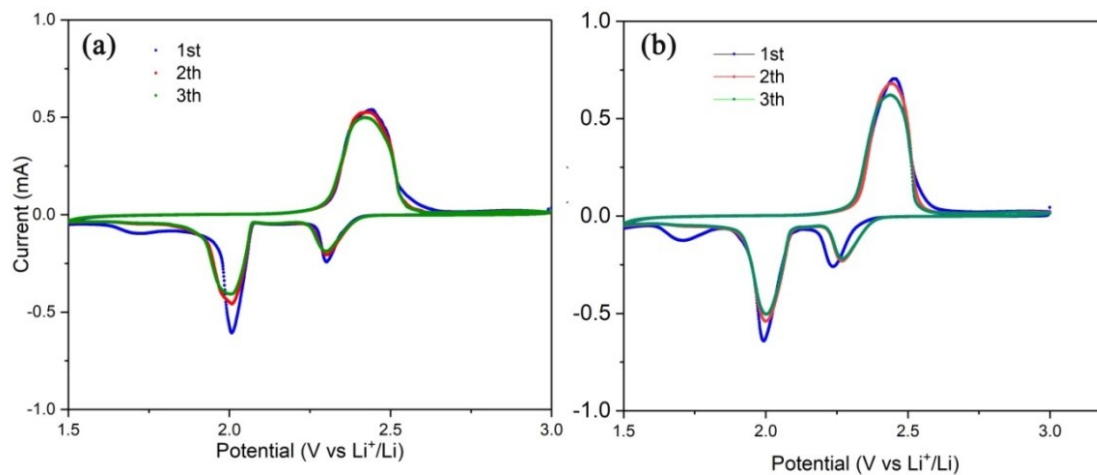

**Fig. S2** CV profiles of (a) PP, (b) PP-O<sup>x</sup>-U at 0.1 mV s<sup>-1</sup>

Table S1. Impedance parameters of the Li-S batteries with the three different separators before and after 500 cycles

| Samples              | Before cycling     |                     |                    | After cycling      |                     |                    |
|----------------------|--------------------|---------------------|--------------------|--------------------|---------------------|--------------------|
|                      | R <sub>s</sub> (Ω) | R <sub>ct</sub> (Ω) | R <sub>i</sub> (Ω) | R <sub>s</sub> (Ω) | R <sub>ct</sub> (Ω) | R <sub>i</sub> (Ω) |
| PP                   | 8.02               | 41.46               | 11.52              | 9.1                | 186.07              | 151.11             |
| PP-O <sup>x</sup>    | 7.43               | 38.61               | ---                | 8.48               | 67.03               | ---                |
| PP-O <sup>x</sup> -U | 4.5                | 31.94               | 9.47               | 5.51               | 35.06               | 14.15              |
